# Supplementary material
Source: PubMed Central journal article supplement (PMC10874622)
Supplement: NIHMS1962102-supplement-1.pdf [file NIHMS1962102-supplement-1.pdf]

866 **Supplementary methods:**

867 *Conventional Transmission Electron Microscopy*

868 For conventional transmission electron microscopy, cells grown on a MatTek glass  
869 bottom dish were pre-fixed in a mixture of 2% glutaraldehyde and 2% paraformaldehyde  
870 in 0.1 M sodium cacodylate buffer, pH 7.2 (Electron Microscopy Sciences, Hatfield, PA,  
871 USA) overnight at 4°C, followed by post-fixation in a mixture of 1% osmium tetroxide  
872 and 1% potassium ferrocyanide in 0.1 M sodium cacodylate buffer for 15 minutes on  
873 ice. The fixed cells were en bloc contrasted with 1% uranyl acetate for 15 minutes at  
874 RT. Following contrasting, the cells were treated with Walton's lead aspartate for 8  
875 minutes at 60°C. The fixed and contrasted cells were dehydrated in ascending ethanol  
876 series (10, 30, 50, 70, 80, 95, and 100 %), embedded in Spurr's resin (Electron  
877 Microscopy Sciences, Hatfield, PA, USA), and thermally polymerized for 24 hours at  
878 70°C. The polymerized cells were transferred to resin by detaching a coverslip under  
879 the MatTek dish using liquid nitrogen. The resin polymerized cells were sectioned using  
880 a Leica EM ARTOS 3D ultramicrotome (Leica Microsystems, Deerfield, IL, USA) and a  
881 diamond knife (DiATOME, Hatfield, PA, USA). 70 nm ultrathin sections were obtained  
882 and observed with a Thermo Fisher Scientific Tecnai G2 F20 Twin transmission  
883 electron microscope (Thermo Fisher Scientific USA, Waltham, MA, USA) at 80 KeV with  
884 a 15 megapixel of AMT NanoSprint15 Mk-II high sensitivity sCMOS camera (Advanced  
885 Microscopy Techniques, Woburn, MA, USA).

886 *Confocal Microscopy*

887 MEG-01 cells were differentiated with PMA (100nM) in presence or absence of  
888 Ceefourin (20  $\mu$ M) for 2 days in  $\mu$ -Slide with 4 wells (ibidi), coated with fibronectin  
889 (Corning). Cells were stained with Wheat germ agglutinin (WGA, Invitrogen) and  
890 Hoechst 33342 dye (Thermo Fisher Scientific) 10 minutes before live imaging under  
891 confocal microscope (Zeiss Axio Observer with CSU-X spinning disc and 4 diode  
892 lasers) using 63X oil objective lens. Images were analyzed by SlideBook 6 software.

893

894

895 *Co-immunoprecipitation*

896 Differentiating MEG-01 cells were treated with or without Ceefourin2 were harvested  
897 after 2 days and lysed in M-PER mammalian protein extraction reagent (Pierce) with  
898 protease inhibitor cocktail (Roche) on ice for 30-45 minutes. Supernatant containing the  
899 protein was separated by centrifuging at maximum speed at 4°C for 15 minutes. Protein  
900 quantification was performed using BCA protein assay (Pierce). 250  $\mu$ g of proteins from  
901 each treatment conditions were incubated with 3  $\mu$ g of primary antibody (PKA-C, Bio-  
902 RAD, # VMA00679) or control Igg (G3A1 mAb IgG1 Isotype Control, Cell Signaling,  
903 #5415) overnight at 4°C. Lysis buffer was added to the protein-antibody mixture so that  
904 the concentration was 1 mg/ml. The mixture was incubated with protein G-agarose  
905 beads (Pierce) for 3 hours at 4°C and washed three times with the lysis buffer by  
906 spinning at 2000g, 4°C for 2 minutes. Co-immunoprecipitated proteins were eluted off  
907 the beads in Trident 6X Laemmli SDS sample buffer (Gene Tex, GTX16357) containing  
908 25 mM dithiothreitol (DTT, Thermo Fisher) by shaking at 500 rpm, 37°C for 30 minutes.  
909 The supernatant containing the co-immunoprecipitated proteins were separated from  
910 the beads by centrifuging at 2000g, 4°C for 2 minutes and analyzed by immunoblotting.

911

912 *Immunoblotting*

913

914 Proteins were loaded into 4-15% gradient polyacrylamide gel and separated by SDS-  
915 PAGE gel electrophoresis. Proteins in the gel were transferred into nitrocellulose  
916 membrane, blocked with 5% non-fat dry milk for an hour at RT, probed with primary  
917 antibodies (ABCC4, clone M4I10, Abcam, # ab15602; GAPDH, Proteintech, 60004-1-IG;  
918 BAX, Cell Signaling, # 2772S; Bcl-XL, Cell signaling, # 2764S; Bcl-2, Cell signaling, #  
919 3498S; PKA-C, Cell Signaling, # 4782S; PKA-RIIB, BD Transduction Lab, # 610626;  
920 Actin, clone AC-15, Sigma, # A1978; GATA1, Cell signaling, # 3535S; TPOR (MPL),  
921 BIOSS # bs-11311R; ETV6, Invitrogen, # PA5-109697) for overnight at 4°C. All the  
922 primary antibodies were used at 1:1000 dilution, except for GAPDH and Actin  
923 (1:10000). The membrane was washed three times with Tris-buffer saline containing  
924 Tween 20 before incubation in secondary antibodies (Peroxidase conjugated affinipure

925 Donkey Anti-Rat IgG (H+L), # 712-035-150; Donkey Anti-Rabbit IgG (H+L), #711-035-  
926 152; Donkey Anti-Mouse IgG (H+L), #715-035-150; Jackson Immuno Research  
927 Laboratories. Inc, 1:10000) for 1 hour at RT. The Bio-Rad Clarity™ western ECL  
928 chemiluminescence substrate was used for peroxidase detection, using Odyssey Fc  
929 imaging system (LI-COR Biosciences). The densitometric quantification of the  
930 immunoblots were performed using Image Studio Lite version 5.2.

931

932

933

934

### 935 *Histochemistry*

936

937 Bone marrow obtained from femur and tibia of mice were initially fixed in  
938 paraformaldehyde, dehydrated, and embedded in paraffin. The sections of paraffin-  
939 embedded tissues were stained with hematoxylin and eosin for morphological analysis.  
940 Hematoxylin stains nucleus blue and eosin stains extracellular matrix and cytoplasm  
941 pink, with other cellular structures taking different shades of pink. MKs were  
942 distinguished from other cells by their larger size, lobulated nucleus, and irregular edges  
943 with numerous villi. Fluorescence images were obtained using a Nikon Eclipse Ti  
944 fluorescence microscope with a 40X objective and analyzed by NIS Elements AR  
945 (version 4.5).

946

### 947 *cAMP ELISA Assay*

948

949 cAMP levels were quantified using Direct cAMP ELISA kit (Enzo), following the  
950 manufacturer's instructions.

951

952

### 953 *siRNA transfection*

954

955 MEG-01 cells were transfected with either negative control siRNA or ABCC4 siRNAs  
956 from Qiagen: Hs\_ABCC4\_3,5 and 8 Flexitube siRNA (#SI00081830, SI03096751,  
957 #SI04952136) using Lipofectamine 2000 as per the manufacturer's protocol. 25nM of  
958 siRNAs were complexed with 5µl of Lipofectamine 2000 in reduced serum media. The  
959 cells were incubated with ABCC4 siRNA-lipofectamine complex for overnight and  
960 treated with PMA (100nM). After incubation for another 48 hours, the cells were  
961 processed as needed.

962

### 963 *ChIP-seq, ATAC-seq and Hi-C data analysis*

964 The ChIP-seq from K562 cells were from ENCODE portal<sup>61</sup> with the following identifiers:  
965 ENCF783AFF, ENCF484YEL, ENCF072KHT, ENCF533LHP, ENCF204SDM,  
966 ENCF670JFE, ENCF460URK and ENCF832FFP. In brief, the single-end reads were  
967 trimmed for adapters, aligned to hg19 and deduplicated using Picard; two replicates  
968 were pooled, and fold change bigwig files were generated against INPUT.

969 The GMP and MEP ATAC-seq were from Corces, et.al<sup>30</sup> and UCSC Genome Browser  
970 Track Hub URL - [https://s3-us-west-1.amazonaws.com/chang-public-](https://s3-us-west-1.amazonaws.com/chang-public-data/2016_NatGen_ATAC-AML/hub.txt)  
971 [data/2016 NatGen ATAC-AML/hub.txt](https://s3-us-west-1.amazonaws.com/chang-public-data/2016_NatGen_ATAC-AML/hub.txt) According to Corces, et.al, the reads were  
972 aligned to hg19 using bowtie2, deduplicated by Picard and adjusted by quantile and GC  
973 normalization using CQN R package.<sup>62</sup>

974

975 Promoter capture Hi-C for CD34<sup>+</sup> hematopoietic progenitors cells were from Mifsud,  
976 et.al<sup>63</sup>, [https://ftp.ebi.ac.uk/biostudies/fire/E-MTAB-323/E-MTAB-](https://ftp.ebi.ac.uk/biostudies/fire/E-MTAB-323/E-MTAB-2323/Files/TS5_CD34_promoter-other_significant_interactions.txt)  
977 [2323/Files/TS5 CD34\\_promoter-other significant interactions.txt](https://ftp.ebi.ac.uk/biostudies/fire/E-MTAB-323/E-MTAB-2323/Files/TS5_CD34_promoter-other_significant_interactions.txt) as per the authors'  
978 description and data were preprocessed using HiCUP.

979
